# Supplementary material
Source: PubMed Central journal article supplement (PMC6956595)
Supplement: NIHMS1059277-supplement-Supplementary_file_1.pdf [file NIHMS1059277-supplement-Supplementary_file_1.pdf]

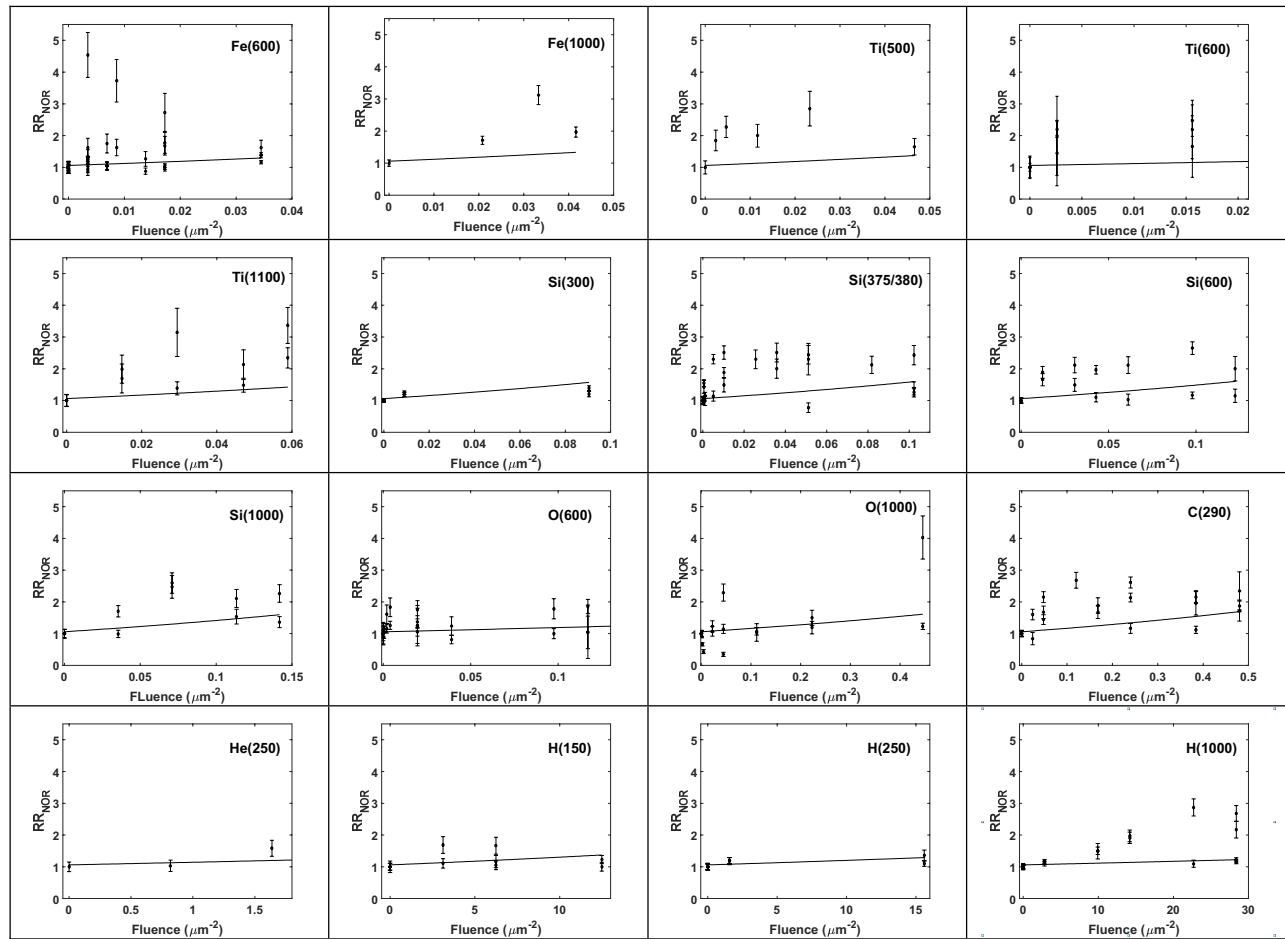

**Supplementary Figure S1. Comparison of experimental data with modeling results of global fitting to sigma-fluence model.**
